# Supplementary material for: Effects of wastewater treatment plant effluent inputs on planktonicmetabolic rates and microbial community composition in the Baltic Sea
Source: Copernicus journal article supplement (doi:10.5194/bg-13-4751-2016), 2016-08-23
Supplement: Supplementary file 1 [file bg-13-4751-2016-supplement.pdf]

Supplement of Biogeosciences, 13, 4751–4765, 2016  
<http://www.biogeosciences.net/13/4751/2016/>  
doi:10.5194/bg-13-4751-2016-supplement  
© Author(s) 2016. CC Attribution 3.0 License.

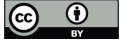

*Supplement of*

## **Effects of wastewater treatment plant effluent inputs on planktonic metabolic rates and microbial community composition in the Baltic Sea**

**Raquel Vaquer-Sunyer et al.**

*Correspondence to:* Raquel Vaquer-Sunyer (raquel.vaquer@uib.cat)

The copyright of individual parts of the supplement might differ from the CC-BY 3.0 licence.

Table S1. Nutrients (in  $\mu\text{M}$ ) and metabolic rates ( $\text{mmol O}_2 \text{ m}^{-3} \text{ d}^{-1}$ ) for all days and treatments for the four experiments.

| Experiment | Day | Sample | Mean TDN ( $\mu\text{M}$ ) | SE   | Mean $\text{NO}_2^-$ | SE   | Mean $\text{NO}_3^-$ | SE   | NH4   | SE   | DON   | SE   | Mean DPA ( $\mu\text{M}$ ) | SE   | Mean $\text{PO}_4^{3-}$ | SE   | NCP   | SD    | GPP   | SD    | CR     | SD    | Temp. | SD   | Mean BP ( $\mu\text{g C L}^{-1} \text{ h}^{-1}$ ) | SE   | Mean Chl.a ( $\mu\text{g/l}$ ) | SE   | DOC ( $\mu\text{M}$ ) | SE    |
|------------|-----|--------|----------------------------|------|----------------------|------|----------------------|------|-------|------|-------|------|----------------------------|------|-------------------------|------|-------|-------|-------|-------|--------|-------|-------|------|---------------------------------------------------|------|--------------------------------|------|-----------------------|-------|
| WWTP-S     | T0  | C      | 16.51                      | 0.08 | 0.01                 | 0.00 | 0.50                 | 0.09 | 0.24  | 0.00 | 15.76 | 0.12 | 0.17                       | 0.01 | 0.03                    | 0.01 | 15.40 | 9.26  | 42.82 | 11.20 | -27.41 | 1.94  |       |      | 5.98                                              | 0.34 | 6.49                           | 0.01 |                       |       |
| WWTP-S     | T0  | CD     | 12.59                      | 0.29 |                      |      | 0.35                 | 0.02 | 0.49  | 0.07 | 11.74 | 0.30 | 0.21                       | 0.05 | 0.02                    | 0.00 | 16.92 | 4.64  | 43.01 | 7.87  | -26.09 | 3.23  |       |      | 6.02                                              | 0.69 | 7.12                           | 0.11 | 274.30                | 2.30  |
| WWTP-S     | T0  | 1:10   | 64.04                      | 0.88 | 2.92                 | 0.05 | 28.87                | 0.45 | 13.26 | 0.15 | 19.00 | 0.99 | 0.50                       | 0.07 | 0.05                    | 0.00 | 23.12 | 4.24  | 47.36 | 2.89  | -24.24 | 7.12  |       |      | 5.15                                              | 0.46 | 6.98                           | 0.19 | 387.42                | 2.03  |
| WWTP-S     | T0  | 1:5    | 110.89                     | 2.11 | 4.79                 | 0.13 | 46.84                | 1.32 | 26.82 | 1.13 | 32.44 | 2.73 | 0.63                       | 0.03 | 0.10                    | 0.01 | 22.78 | 5.78  | 46.74 | 2.29  | -23.96 | 8.07  |       |      | 4.60                                              | 0.53 | 5.21                           | 0.10 |                       |       |
| WWTP-S     | T0  | IN     | 48.84                      | 0.97 | 6.48                 | 0.03 | 27.33                | 0.68 | 0.55  | 0.09 | 14.49 | 1.19 | 0.10                       | 0.04 | 0.11                    | 0.00 | 11.73 | 3.01  | 33.41 | 2.93  | -21.68 | 5.94  |       |      | 4.16                                              | 0.35 | 6.50                           | 0.31 | 272.07                | 3.18  |
| WWTP-S     | T1  | C      | 17.63                      | 0.46 | 0.03                 | 0.02 | 0.32                 | 0.06 | 0.16  | 0.02 | 17.12 | 0.46 | 0.15                       | 0.01 | 0.03                    | 0.01 | 3.22  | 1.13  | 35.81 | 2.26  | -32.59 | 1.12  | 18.49 | 0.00 | 3.77                                              | 0.20 | 6.49                           | 0.08 | 340.19                | 1.87  |
| WWTP-S     | T1  | CD     | 12.01                      | 1.05 | 0.03                 | 0.00 | 0.44                 | 0.05 | 0.17  | 0.02 | 11.37 | 1.05 | 0.12                       | 0.00 | 0.02                    | 0.00 | 5.56  | 1.68  | 31.10 | 10.25 | -25.55 | 8.57  | 18.49 | 0.00 | 4.14                                              | 0.35 | 6.52                           | 0.38 | 270.34                | 3.50  |
| WWTP-S     | T1  | 1:10   | 63.72                      | 0.41 | 3.00                 | 0.02 | 29.66                | 0.55 | 12.30 | 0.16 | 18.76 | 0.70 | 0.44                       | 0.04 | 0.04                    | 0.01 | 1.78  | 2.87  | 29.76 | 12.84 | -27.98 | 9.97  | 18.49 | 0.00 | 5.97                                              | 0.73 | 4.83                           | 0.01 | 390.36                | 1.41  |
| WWTP-S     | T1  | 1:5    | 113.07                     | 1.30 | 5.90                 | 0.01 | 58.96                | 2.77 | 21.01 | 3.58 | 27.19 | 4.71 | 0.59                       | 0.01 | 0.05                    | 0.01 | 3.83  | 1.62  | 33.80 | 2.17  | -29.97 | 3.78  | 18.49 | 0.00 | 7.86                                              | 0.85 | 5.31                           | 0.02 | 494.36                | 1.76  |
| WWTP-S     | T1  | IN     | 45.50                      | 0.59 | 6.07                 | 0.20 | 25.98                | 1.13 | 0.12  | 0.02 | 13.33 | 1.26 | 0.12                       | 0.01 | 0.06                    | 0.02 | 3.95  | 0.44  | 26.87 | 7.20  | -22.92 | 6.76  | 18.49 | 0.00 | 3.51                                              | 1.92 | 5.92                           | 0.22 | 271.36                | 2.69  |
| WWTP-S     | T3  | C      | 17.93                      | 0.39 |                      |      | 0.35                 | 0.02 | 0.42  | 0.04 | 17.17 | 0.39 | 0.14                       | 0.01 | 0.04                    | 0.01 | 2.28  | 0.82  | 37.17 | 2.18  | -34.89 | 1.35  | 18.50 | 0.00 | 4.28                                              | 0.22 | 5.63                           | 0.05 |                       |       |
| WWTP-S     | T3  | CD     | 12.92                      | 0.21 |                      |      | 0.51                 | 0.11 | 0.15  | 0.05 | 12.26 | 0.24 | 0.19                       | 0.08 | 0.03                    | 0.01 | 1.47  | 1.69  | 31.85 | 2.84  | -30.38 | 1.15  | 18.50 | 0.00 | 3.63                                              | 0.43 | 4.89                           | 0.16 | 271.87                | 5.45  |
| WWTP-S     | T3  | 1:10   | 62.08                      | 0.48 | 2.91                 | 0.01 | 28.60                | 0.35 | 10.46 | 0.13 | 20.11 | 0.61 | 0.28                       | 0.04 | 0.03                    | 0.01 | 9.51  | 0.91  | 47.45 | 6.57  | -37.94 | 5.66  | 18.50 | 0.00 | 4.24                                              | 0.20 | 8.83                           | 0.15 | 387.63                | 1.76  |
| WWTP-S     | T3  | 1:5    | 107.64                     | 0.76 | 5.86                 | 0.02 | 59.08                | 1.03 | 24.24 | 0.22 | 18.45 | 1.30 | 0.56                       | 0.03 | 0.03                    | 0.01 | 9.86  | 0.04  | 43.71 | 9.20  | -33.85 | 9.17  | 18.50 | 0.00 | 6.62                                              | 0.87 | 9.37                           | 0.07 | 494.77                | 1.43  |
| WWTP-S     | T3  | IN     | 44.58                      | 1.36 | 6.22                 | 0.04 | 25.40                | 1.01 | 0.09  | 0.03 | 12.87 | 1.70 | 0.10                       | 0.01 | 0.02                    | 0.00 | 10.39 | 1.03  | 45.27 | 10.96 | -34.88 | 9.93  | 18.50 | 0.00 | 3.35                                              | 0.15 | 9.43                           | 0.07 | 268.82                | 1.02  |
| WWTP-S     | T5  | C      | 17.09                      | 0.29 | 0.02                 | 0.01 | 0.32                 | 0.03 | 0.60  | 0.01 | 16.16 | 0.29 | 0.18                       | 0.01 | 0.03                    | 0.01 | 3.83  | 3.62  | 36.19 | 4.64  | -32.36 | 1.02  | 18.37 | 0.00 | 5.25                                              | 0.79 | 5.90                           | 0.00 | 349.01                | 2.42  |
| WWTP-S     | T5  | CD     | 13.74                      | 0.39 | 0.01                 | 0.00 | 0.42                 | 0.02 | 0.03  | 0.01 | 13.28 | 0.39 | 0.15                       | 0.02 | 0.02                    | 0.00 | 4.74  | 0.24  | 35.68 | 4.05  | -30.93 | 3.81  | 18.37 | 0.00 | 2.83                                              | 0.21 | 5.31                           | 0.11 | 275.01                | 1.79  |
| WWTP-S     | T5  | 1:10   | 59.98                      | 0.54 | 2.73                 | 0.02 | 28.52                | 1.03 | 9.32  | 0.12 | 19.41 | 1.17 | 0.31                       | 0.01 | 0.03                    | 0.00 | 10.89 | 0.57  | 42.75 | 4.15  | -31.86 | 4.72  | 18.37 | 0.00 | 5.83                                              | 0.16 | 9.38                           | 0.36 | 484.84                | 1.51  |
| WWTP-S     | T5  | 1:5    | 105.59                     | 1.78 | 5.61                 | 0.00 | 58.79                | 1.40 | -0.47 | 0.06 | 41.66 | 2.26 | 0.49                       | 0.03 | 0.03                    | 0.00 | 15.23 | 2.63  | 56.52 | 1.11  | -41.29 | 1.52  | 18.37 | 0.00 | 8.06                                              | 0.76 | 11.27                          | 0.08 | 628.47                | 1.20  |
| WWTP-S     | T5  | IN     | 41.75                      | 0.18 | 5.83                 | 0.02 | 22.92                | 0.34 | 18.70 | 0.56 | -5.70 | 0.68 | 0.09                       | 0.02 | 0.03                    | 0.01 | 15.35 | 1.69  | 52.71 | 6.12  | -37.36 | 4.43  | 18.37 | 0.00 | 5.71                                              | 0.16 | 11.48                          | 0.57 | 488.08                | 2.38  |
| WWTP-S     | T7  | C      | 16.77                      | 0.63 | 0.01                 | 0.01 | 0.36                 | 0.05 | 0.01  | 0.00 | 16.40 | 0.63 | 0.12                       | 0.03 | 0.03                    | 0.00 | 20.17 | 5.78  | 54.16 | 5.31  | -33.99 | 11.09 | 18.33 | 0.04 | 2.84                                              | 0.20 | 6.41                           | 0.30 | 483.62                | 3.64  |
| WWTP-S     | T7  | CD     | 13.99                      | 1.03 |                      |      | 0.33                 | 0.03 | 0.06  | 0.03 | 13.60 | 1.03 | 0.11                       | 0.01 | 0.03                    | 0.00 | 8.20  | 7.29  | 36.11 | 11.34 | -27.91 | 4.05  | 18.33 | 0.04 | 2.10                                              | 0.16 | 5.12                           | 0.37 | 345.86                | 0.90  |
| WWTP-S     | T7  | 1:10   | 58.39                      | 0.42 | 2.50                 | 0.06 | 28.36                | 0.96 | 8.27  | 0.11 | 19.26 | 1.06 | 0.31                       | 0.01 | 0.04                    | 0.01 | 15.59 | 19.91 | 46.15 | 23.02 | -30.56 | 3.11  | 18.33 | 0.04 | 3.95                                              | 0.77 | 9.68                           | 0.14 | 554.98                | 12.74 |

| Experiment | Day | Sample | Mean TDN (μM) | SE   | Mean NO <sub>2</sub> <sup>-</sup> | SE   | Mean NO <sub>3</sub> <sup>-</sup> | SE   | NH <sub>4</sub> <sup>+</sup> | SE   | DON   | SE   | Mean DPA (μM) | SE   | Mean PO <sub>4</sub> <sup>3-</sup> | SE     | NCP   | SD    | GPP   | SD     | CR     | SD   | Temp. | SD   | Mean BP (μg C L <sup>-1</sup> h <sup>-1</sup> ) | SE   | Mean Chl.a (μg/l) | SE   | DOC (μM) | SE     |       |
|------------|-----|--------|---------------|------|-----------------------------------|------|-----------------------------------|------|------------------------------|------|-------|------|---------------|------|------------------------------------|--------|-------|-------|-------|--------|--------|------|-------|------|-------------------------------------------------|------|-------------------|------|----------|--------|-------|
| WWTP-S     | T7  | 1:5    | 101.79        | 1.71 | 5.31                              | 0.01 | 57.37                             | 0.52 | 19.07                        | 0.25 | 20.04 | 1.81 | 0.49          | 0.01 | 0.03                               | 0.01   | 27.31 | 9.77  | 77.98 | 14.45  | -50.67 | 4.68 | 18.33 | 0.04 | 5.85                                            | 0.51 | 15.23             | 0.34 |          |        |       |
| WWTP-S     | T7  | IN     | 39.64         | 0.42 | 5.69                              | 0.01 | 21.18                             | 0.22 | 0.01                         |      | 12.76 | 0.48 | 0.10          | 0.02 | 0.04                               | 0.00   | 36.69 | 1.49  | 85.67 | 7.13   | -48.97 | 5.64 | 18.34 | 0.04 | 4.52                                            | 0.91 | 10.45             | 0.25 | 327.21   | 27.23  |       |
| WW-F       | T0  | C      | 20.99         | 0.34 | 0.21                              | 0.05 | 2.64                              | 0.32 | 0.23                         | 0.03 | 17.91 | 0.47 | 0.24          | 0.03 | 0.39                               | 0.02   |       |       |       |        |        |      |       |      | 0.39                                            | 0.04 | 1.76              | 0.04 | 318.45   | 9.42   |       |
| WW-F       | T0  | CD     | 16.84         | 0.37 | 0.21                              | 0.02 | 2.57                              | 0.26 | 0.47                         | 0.01 | 13.59 | 0.45 | 0.19          | 0.02 | 0.50                               | 0.03   |       |       |       |        |        |      |       |      | 0.29                                            | 0.03 | 1.66              | 0.12 | 245.16   | 3.20   |       |
| WW-F       | T0  | 1:10   | 66.17         | 0.69 | 2.34                              | 0.06 | 31.44                             | 0.73 | 16.84                        | 0.19 | 15.55 | 1.02 | 0.56          | 0.10 | 0.65                               | 0.02   |       |       |       |        |        |      |       |      | 0.37                                            | 0.05 | 1.64              | 0.27 | 320.71   | 1.28   |       |
| WW-F       | T0  | 1:5    | 114.85        | 1.26 | 2.97                              | 0.10 | 42.80                             | 1.77 | 31.29                        | 0.23 | 37.79 | 2.18 | 0.78          | 0.04 | 0.47                               | 0.02   |       |       |       |        |        |      |       |      | 0.37                                            | 0.01 | 1.60              | 0.04 | 393.78   | 3.56   |       |
| WW-F       | T0  | IN     | 63.11         | 0.44 | 2.89                              | 0.15 | 30.75                             | 1.80 | 0.21                         | 0.01 | 29.26 | 1.85 | 0.03          | 0.01 | 0.40                               | 0.03   |       |       |       |        |        |      |       |      | 0.32                                            | 0.02 | 1.30              | 0.11 | 274.08   | 14.45  |       |
| WW-F       | T1  | C      | 19.98         | 0.37 | 0.30                              | 0.01 | 3.43                              | 0.22 | 0.08                         | 0.01 | 16.17 | 0.43 |               | 0.70 | 0.08                               | -8.83  |       | 14.61 |       | -23.44 |        |      | 7.69  | 0.13 | 0.59                                            | 0.04 | 1.16              | 0.08 | 299.29   | 2.72   |       |
| WW-F       | T1  | CD     | 16.85         | 0.27 | 0.22                              | 0.04 | 2.66                              | 0.29 | 0.23                         | 0.01 | 13.74 | 0.39 |               | 0.46 | 0.09                               | -10.86 | 0.08  | 13.31 | 1.96  | -24.17 | 1.88   |      | 7.78  | 0.00 | 0.57                                            | 0.03 | 0.90              | 0.06 | 285.17   | 22.24  |       |
| WW-F       | T1  | 1:10   | 58.25         | 3.82 | 2.09                              | 0.05 | 29.62                             | 1.26 | 16.43                        | 0.13 | 10.11 | 4.03 |               | 0.56 | 0.03                               | -10.30 |       | 9.03  |       | -19.04 | 0.41   |      | 7.69  | 0.13 | 0.69                                            | 0.02 | 0.89              | 0.14 | 434.00   | 10.94  |       |
| WW-F       | T1  | 1:5    | 117.31        | 1.88 | 3.45                              | 0.23 | 51.58                             | 3.51 | 28.97                        | 0.86 | 33.31 | 4.06 |               | 0.51 | 0.03                               | -9.49  |       | 6.59  |       | -17.24 | 1.63   |      | 7.69  | 0.14 | 0.61                                            | 0.03 | 0.82              | 0.03 | 429.91   | 5.41   |       |
| WW-F       | T1  | IN     | 63.81         | 0.56 | 4.26                              | 0.06 | 49.16                             | 0.87 | 0.18                         | 0.02 | 10.21 | 1.03 |               | 0.60 | 0.03                               | -10.15 | 2.49  | 5.28  | 1.41  | -15.43 | 1.08   |      | 7.78  | 0.00 | 0.56                                            | 0.06 | 0.70              | 0.07 | 291.84   | 25.46  |       |
| WW-F       | T3  | C      | 19.99         | 0.59 | 0.28                              | 0.05 | 3.20                              | 0.26 | 0.05                         | 0.01 | 16.46 | 0.64 | 0.14          | 0.04 | 0.68                               | 0.07   | 2.89  | 1.64  | 22.38 | 3.02   | -19.48 | 1.39 |       | 7.18 | 0.00                                            | 0.66 | 0.05              | 1.48 | 0.05     | 297.31 | 6.59  |
| WW-F       | T3  | CD     | 15.47         | 0.76 | 0.12                              | 0.02 | 2.24                              | 0.10 | 0.09                         | 0.01 | 13.02 | 0.76 | 0.16          | 0.01 | 0.32                               | 0.05   | 1.76  | 1.21  | 21.09 | 0.85   | -19.32 | 0.36 |       | 7.18 | 0.00                                            | 1.47 | 0.21              | 1.19 | 0.01     | 292.95 | 6.68  |
| WW-F       | T3  | 1:10   | 68.07         | 0.72 | 1.89                              | 0.38 | 27.53                             | 6.32 | 16.17                        | 0.14 | 22.49 | 6.35 | 0.34          | 0.01 | 0.49                               | 0.11   | 1.44  | 0.77  | 18.12 | 0.09   | -16.68 | 0.68 |       | 7.18 | 0.00                                            | 1.86 | 0.49              | 1.52 | 0.04     | 311.10 | 6.53  |
| WW-F       | T3  | 1:5    | 116.68        | 0.84 | 3.12                              | 0.02 | 47.73                             | 1.13 | 31.29                        | 0.33 | 34.53 | 1.45 | 0.70          | 0.03 | 0.45                               | 0.02   | 1.25  | 0.46  | 14.79 | 1.05   | -13.54 | 0.59 |       | 7.18 | 0.00                                            | 2.54 | 0.25              | 1.54 | 0.10     | 361.20 | 4.06  |
| WW-F       | T3  | IN     | 61.72         | 1.20 | 2.53                              | 0.48 | 28.50                             | 5.42 | -0.02                        | 0.01 | 30.72 | 5.53 | 0.03          | 0.01 | 0.32                               | 0.08   | 0.36  | 0.37  | 10.56 | 1.81   | -10.20 | 1.44 |       | 7.18 | 0.00                                            | 1.14 | 0.04              | 0.97 | 0.04     | 227.31 | 2.33  |
| WW-F       | T5  | C      | 18.74         | 0.53 | 0.30                              | 0.01 | 3.44                              | 0.06 | 0.29                         | 0.01 | 14.72 | 0.53 | 0.15          | 0.03 | 0.86                               | 0.02   | 2.23  | 1.17  | 25.77 | 0.54   | -23.54 | 0.64 |       | 7.27 | 0.00                                            | 0.54 | 0.03              | 2.19 | 0.06     | 284.40 | 1.80  |
| WW-F       | T5  | CD     | 15.63         | 0.22 | 0.23                              | 0.03 | 2.59                              | 0.18 | 0.26                         | 0.00 | 12.55 | 0.28 | 0.10          | 0.01 | 0.54                               | 0.05   | 2.90  | 0.08  | 27.08 | 1.63   | -24.17 | 1.71 |       | 7.27 | 0.00                                            | 1.03 | 0.04              | 1.61 | 0.11     | 248.63 | 10.06 |
| WW-F       | T5  | 1:10   | 66.36         | 0.46 | 2.57                              | 0.02 | 38.24                             | 0.78 | 12.27                        | 2.53 | 13.29 | 2.69 | 0.36          | 0.03 | 0.60                               | 0.01   | 2.68  | 1.11  | 24.23 | 3.39   | -21.55 | 2.28 |       | 7.27 | 0.00                                            | 1.84 | 0.09              | 3.65 | 0.20     | 294.46 | 2.23  |
| WW-F       | T5  | 1:5    | 117.00        | 0.86 | 5.05                              | 0.06 | 80.66                             | 2.08 | 30.36                        | 0.50 | 0.93  | 2.31 | 0.65          | 0.01 | 0.69                               | 0.04   | 3.24  | 0.47  | 20.29 | 0.10   | -17.06 | 0.57 |       | 7.27 | 0.00                                            | 3.08 | 0.37              | 3.47 | 0.14     | 379.90 | 3.11  |
| WW-F       | T5  | IN     | 63.35         | 0.45 | 3.83                              | 0.67 | 44.56                             | 8.75 | 0.04                         | 0.02 | 14.92 | 8.74 | 0.05          | 0.02 | 0.52                               | 0.10   | 2.24  | 2.27  | 15.68 | 1.79   | -13.44 | 0.49 |       | 7.27 | 0.00                                            | 0.96 | 0.03              | 1.29 | 0.11     | 228.92 | 1.62  |

| Experiment | Day | Sample | Mean TDN (μM) | SE   | Mean NO <sub>2</sub> <sup>-</sup> | SE   | Mean NO <sub>3</sub> <sup>-</sup> | SE   | NH <sub>4</sub> <sup>+</sup> | SE   | DON   | SE   | Mean DPA (μM) | SE   | Mean PO <sub>4</sub> <sup>3-</sup> | SE   | NCP    | SD    | GPP    | SD    | CR     | SD    | Temp. | SD   | Mean BP (μg C L <sup>-1</sup> h <sup>-1</sup> ) | SE   | Mean Chl.a (μg/l) | SE   | DOC (μM) | SE    |
|------------|-----|--------|---------------|------|-----------------------------------|------|-----------------------------------|------|------------------------------|------|-------|------|---------------|------|------------------------------------|------|--------|-------|--------|-------|--------|-------|-------|------|-------------------------------------------------|------|-------------------|------|----------|-------|
| WW-F       | T7  | C      | 17.21         | 0.61 | 0.14                              | 0.00 | 1.97                              | 0.34 | 0.06                         | 0.00 | 15.04 | 0.70 | 0.12          | 0.08 | 0.69                               | 0.00 | 17.83  | 10.29 | 43.69  | 3.98  | -25.86 | 6.30  | 7.16  | 0.07 | 0.54                                            | 0.04 | 4.87              | 0.21 | 307.88   | 15.57 |
| WW-F       | T7  | CD     | 14.42         | 0.16 | 0.10                              | 0.01 | 1.89                              | 0.04 | 0.16                         | 0.01 | 12.28 | 0.16 | 0.22          | 0.08 | 0.56                               | 0.02 | 14.46  | 4.54  | 43.99  | 4.76  | -29.53 | 9.30  | 7.16  | 0.07 | 0.82                                            | 0.09 | 4.15              | 0.11 | 230.57   | 2.75  |
| WW-F       | T7  | 1:10   | 61.17         | 1.23 | 2.43                              | 0.07 | 35.16                             | 1.09 | 11.39                        | 3.17 | 12.19 | 3.57 | 0.35          | 0.01 | 0.43                               | 0.02 | 24.34  | 15.71 | 60.27  | 9.93  | -35.94 | 25.64 | 7.16  | 0.07 | 1.15                                            | 0.07 | 8.53              | 0.38 | 308.80   | 5.90  |
| WW-F       | T7  | 1:5    | 109.23        | 4.55 | 4.64                              | 0.04 | 73.25                             | 3.25 | 27.90                        | 0.13 | 3.44  | 5.59 | 0.43          | 0.07 | 0.49                               | 0.03 | 19.46  | 9.87  | 73.62  | 45.72 | -54.16 | 55.59 | 7.16  | 0.07 | 1.66                                            | 0.10 | 9.25              | 0.35 | 367.72   | 3.67  |
| WW-F       | T7  | IN     | 63.34         | 0.98 | 4.66                              | 0.06 | 54.92                             | 0.37 |                              |      | 3.76  | 1.04 | 0.09          | 0.00 | 0.58                               | 0.02 | 9.86   | 7.88  | 41.84  | 20.24 | -31.99 | 28.12 | 7.16  | 0.07 | 0.88                                            | 0.07 | 3.08              | 0.34 | 232.41   | 5.44  |
| WW-J       | T0  | C      | 17.07         | 0.87 | 0.35                              | 0.02 | 4.93                              | 0.39 | 0.35                         | 0.01 | 11.44 | 0.95 | 0.09          | 0.01 | 0.55                               | 0.03 |        |       |        |       |        |       |       |      | 0.15                                            | 0.05 | 0.30              | 0.00 | 483.13   | 68.40 |
| WW-J       | T0  | CD     | 13.10         | 0.80 | 0.31                              | 0.01 | 3.36                              | 0.06 | 0.27                         | 0.02 | 9.15  | 0.80 | 0.08          | 0.01 | 0.48                               | 0.01 |        |       |        |       |        |       |       |      | 0.09                                            | 0.06 | 0.59              | 0.05 | 339.56   | 123.9 |
| WW-J       | T0  | 1:10   | 101.14        | 1.95 | 1.08                              | 0.06 | 11.68                             | 0.88 | 75.23                        | 0.59 | 13.15 | 2.22 | 0.97          | 0.03 | 0.77                               | 0.07 |        |       |        |       |        |       |       |      | 0.06                                            | 0.01 | 0.30              | 0.00 | 467.47   | 20.41 |
| WW-J       | T0  | 1:5    | 174.65        | 3.08 | 2.16                              | 0.18 | 27.23                             | 0.35 | 129.69                       | 3.16 | 15.56 | 4.42 | 1.78          | 0.03 | 1.30                               | 0.09 |        |       |        |       |        |       |       |      | 0.05                                            | 0.01 | 0.34              | 0.01 | 570.45   | 35.83 |
| WW-J       | T0  | IN     | 35.21         | 1.31 | 3.17                              | 0.21 | 24.91                             | 2.74 | 2.22                         | 0.07 | 4.92  | 3.03 | 0.11          | 0.01 | 0.72                               | 0.10 |        |       |        |       |        |       |       |      | 0.04                                            | 0.01 | 0.36              | 0.02 | 357.57   | 82.45 |
| WW-J       | T1  | C      | 18.65         | 0.67 | 0.38                              | 0.02 | 4.65                              | 0.69 | 0.45                         | 0.01 | 13.17 | 0.96 | 0.09          | 0.01 | 0.66                               | 0.08 | -2.84  | 5.76  | 4.17   | 2.23  | -7.01  | 3.53  | 3.52  | 0.00 | 0.13                                            | 0.02 | 0.15              | 0.04 | 490.20   | 7.58  |
| WW-J       | T1  | CD     | 13.18         | 1.18 | 0.31                              | 0.03 | 3.17                              | 0.08 | 0.37                         | 0.06 | 9.34  | 1.18 | 0.10          | 0.01 | 0.46                               | 0.02 | -8.64  | 10.10 | -3.72  | 8.81  | -4.92  | 1.28  | 3.53  | 0.00 | 0.09                                            | 0.01 | 0.22              | 0.08 | 385.03   | 6.44  |
| WW-J       | T1  | 1:10   | 94.87         | 2.24 | 0.93                              | 0.21 | 8.32                              | 3.18 | 74.94                        | 1.13 | 10.68 | 4.04 | 0.89          | 0.03 | 0.61                               | 0.22 | -16.64 | 17.69 | -12.51 | 16.31 | -4.13  | 1.38  | 3.49  | 0.06 | 0.11                                            | 0.04 | 0.24              | 0.04 | 522.23   | 5.19  |
| WW-J       | T1  | 1:5    | 191.30        | 1.79 | 2.07                              | 0.20 | 20.58                             | 1.56 | 137.57                       | 1.63 | 31.08 | 2.88 | 1.81          | 0.05 | 1.50                               | 0.05 | -2.76  | 1.75  | 0.20   | 2.20  | -2.96  | 0.45  | 3.53  | 0.00 | 0.08                                            | 0.03 | 0.24              | 0.05 | 647.05   | 8.99  |
| WW-J       | T1  | IN     | 31.22         | 2.01 | 2.64                              | 0.14 | 24.23                             | 0.27 | 2.06                         | 0.02 | 2.29  | 2.02 | 0.11          | 0.01 | 0.41                               | 0.04 | -0.79  | 3.14  | 0.15   | 1.77  | -0.95  | 1.37  | 3.53  | 0.00 | 0.10                                            | 0.01 | 0.20              | 0.01 | 383.44   | 5.72  |
| WW-J       | T3  | C      | 20.16         | 0.37 | 0.38                              | 0.02 | 4.81                              | 0.34 | 0.17                         | 0.01 | 14.81 | 0.50 | 0.03          | 0.01 | 0.61                               | 0.04 | -4.00  | 1.97  | 5.88   | 0.93  | -9.88  | 2.89  | 3.58  | 0.00 | 0.31                                            | 0.14 | 0.16              | 0.00 | 369.97   | 89.08 |
| WW-J       | T3  | CD     | 15.46         | 0.21 | 0.35                              | 0.02 | 3.30                              | 0.10 | 0.26                         | 0.03 | 11.55 | 0.23 | 0.05          | 0.01 | 0.41                               | 0.03 | 1.09   | 0.06  | 6.79   | 0.35  | -5.71  | 0.41  | 3.58  | 0.00 | 0.23                                            | 0.03 | 0.28              | 0.04 | 347.99   | 87.75 |
| WW-J       | T3  | 1:10   | 103.04        | 1.92 | 1.37                              | 0.02 | 11.63                             | 0.70 | 71.02                        | 1.24 | 19.03 | 2.39 | 0.94          | 0.02 | 0.89                               | 0.14 | 0.36   | 1.53  | 6.51   | 1.47  | -6.15  | 0.05  | 3.58  | 0.00 | 0.23                                            | 0.03 | 0.29              | 0.02 | 453.15   | 59.10 |
| WW-J       | T3  | 1:5    | 184.83        | 3.92 | 2.00                              | 0.18 | 27.87                             | 0.66 | 134.52                       | 2.45 | 20.45 | 4.66 | 0.09          | 0.00 | 1.14                               | 0.08 | -0.42  | 0.65  | 6.53   | 0.89  | -6.95  | 1.54  | 3.58  | 0.00 | 0.24                                            | 0.02 | 0.22              |      | 570.89   | 93.60 |
| WW-J       | T3  | IN     | 35.77         | 0.29 | 2.85                              | 0.02 | 30.41                             | 1.78 | 2.01                         | 0.01 | 0.50  | 1.81 | 1.86          | 0.04 | 0.43                               | 0.01 | -1.22  | 0.34  | 5.01   | 1.78  | -6.23  | 1.43  | 3.58  | 0.00 | 0.15                                            | 0.01 | 0.07              |      | 314.44   | 5.26  |
| WW-J       | T5  | C      | 15.39         | 1.58 | 0.39                              | 0.02 | 4.52                              | 0.19 | 0.18                         | 0.01 | 10.29 | 1.59 | 0.07          | 0.01 | 0.69                               | 0.10 | -3.27  | 1.01  | 2.03   | 2.00  | -5.30  | 0.99  | 3.64  | 0.01 | 0.55                                            | 0.20 | 0.35              | 0.01 | 418.52   | 34.02 |
| WW-J       | T5  | CD     | 14.94         | 0.24 | 0.37                              | 0.03 | 3.45                              | 0.40 | 0.02                         | 0.00 | 11.10 | 0.47 | 0.06          | 0.01 | 0.44                               | 0.09 | -2.94  | 0.04  | 1.22   | 0.53  | -4.17  | 0.56  | 3.65  | 0.00 | 0.40                                            | 0.02 | 0.28              | 0.08 | 312.04   | 19.34 |

| Experiment | Day | Sample | Mean TDN ( $\mu\text{M}$ ) |      | Mean $\text{NO}_2^-$ SE |      | Mean $\text{NO}_3^-$ SE |      | $\text{NH}_4^+$ | SE   | DON   | SE   | Mean DPA ( $\mu\text{M}$ ) |      | Mean $\text{PO}_4^{3-}$ SE |       | NCP   | SD    | GPP    | SD     | CR     | SD    | Temp. | SD   | Mean BP ( $\mu\text{g C L}^{-1}\text{ h}^{-1}$ ) |      | Mean Chl.a ( $\mu\text{g/l}$ ) |        | DOC ( $\mu\text{M}$ ) |       |  |
|------------|-----|--------|----------------------------|------|-------------------------|------|-------------------------|------|-----------------|------|-------|------|----------------------------|------|----------------------------|-------|-------|-------|--------|--------|--------|-------|-------|------|--------------------------------------------------|------|--------------------------------|--------|-----------------------|-------|--|
|            |     |        | SE                         | SE   | SE                      | SE   | SE                      | SE   |                 |      |       |      | SE                         | SE   | SE                         | SE    |       |       |        |        |        |       |       |      | SE                                               | SE   | SE                             | SE     | SE                    | SE    |  |
| WW-J       | T5  | 1:10   | 94.20                      | 1.16 | 1.26                    | 0.02 | 13.57                   | 0.70 | 68.23           | 4.30 | 11.15 | 4.51 | 0.97                       | 0.03 | 0.87                       | 0.04  | -4.76 | 0.16  | 0.14   | 1.91   | -4.90  | 1.75  | 3.65  | 0.00 | 0.55                                             | 0.04 | 0.35                           | 0.04   | 497.34                | 104.0 |  |
| WW-J       | T5  | 1:5    | 188.49                     | 3.16 | 1.78                    | 0.12 | 26.49                   | 0.82 | 121.77          | 3.39 | 38.46 | 4.71 | 1.70                       | 0.05 | 1.12                       | 0.05  | -3.31 | 1.40  | -0.37  | 0.24   | -2.94  | 1.64  | 3.65  | 0.00 | 0.65                                             | 0.04 | 0.29                           | 0.01   | 906.24                | 93.29 |  |
| WW-J       | T5  | IN     | 35.67                      | 0.33 | 3.33                    | 0.23 | 33.05                   | 1.40 | 1.84            | 0.03 | -2.54 | 1.42 | 0.05                       | 0.02 | 0.71                       | 0.20  | -3.00 | 1.65  | 8.19   | 10.66  | -11.19 | 9.01  | 3.65  | 0.00 | 0.29                                             | 0.04 | 0.21                           | 0.05   | 321.31                | 33.29 |  |
| WW-J       | T7  | C      | 17.55                      | 0.78 | 0.41                    | 0.01 | 3.74                    | 0.15 | 0.40            | 0.42 | 13.01 | 0.90 | 0.07                       | 0.00 | 0.50                       | 0.06  | 4.18  | 1.05  | 19.16  | 8.81   | -14.98 | 9.87  | 3.72  | 0.01 | 0.62                                             | 0.02 | 0.36                           | 0.01   | 446.54                | 57.58 |  |
| WW-J       | T7  | CD     | 15.55                      | 0.16 | 0.37                    | 0.04 | 4.16                    | 0.23 | 0.09            | 0.01 | 10.92 | 0.27 | 0.04                       | 0.00 | 0.42                       | 0.02  | 10.07 | 9.13  | -34.15 | 40.27  | 44.22  | 49.40 | 3.72  | 0.00 | 1.38                                             | 0.69 | 0.26                           | 0.03   | 418.79                | 201.9 |  |
| WW-J       | T7  | 1:10   | 99.55                      | 2.89 | 1.40                    | 0.05 | 17.44                   | 0.95 | 76.98           | 1.14 | 3.72  | 3.25 | 0.96                       | 0.21 | 0.89                       | 0.06  | 2.74  | 4.03  | 11.03  | 17.02  | -8.28  | 21.05 | 3.72  | 0.00 | 1.12                                             | 0.03 | 0.32                           | 0.04   | 699.62                | 13.68 |  |
| WW-J       | T7  | 1:5    | 194.64                     | 1.29 | 2.16                    | 0.18 | 24.89                   | 0.86 | 134.58          | 5.56 | 33.01 | 5.77 | 1.94                       | 0.05 | 1.08                       | 0.11  | 0.76  | 1.07  | 4.68   | 5.96   | -3.92  | 4.89  | 3.72  | 0.00 | 1.14                                             | 0.07 | 0.26                           | 0.02   | 844.06                | 10.78 |  |
| WW-J       | T7  | IN     | 34.29                      | 1.30 | 2.99                    | 0.32 | 27.89                   | 4.00 | 1.81            | 0.01 | 1.59  | 4.20 | 0.07                       | 0.01 | 0.36                       | 0.06  | 2.05  | 0.62  | 18.73  | 17.31  | -16.68 | 17.92 | 3.72  | 0.00 | 0.63                                             | 0.02 | 0.27                           | 0.02   | 427.80                | 115.8 |  |
| WW-A       | T0  | C      | 16.40                      | 0.63 | 0.14                    | 0.00 | 3.69                    | 0.14 | 0.01            | 0.01 | 12.56 | 0.64 | 0.31                       | 0.01 | 0.63                       | 0.03  |       |       |        |        |        |       |       |      | 0.24                                             | 0.05 | 2.34                           | 0.27   | 297.38                | 3.08  |  |
| WW-A       | T0  | CD     | 12.72                      | 0.47 | 0.12                    | 0.01 | 3.29                    | 0.06 | 0.14            | 0.01 | 9.17  | 0.48 | 0.22                       | 0.03 | 0.51                       | 0.03  |       |       |        |        |        |       |       |      | 0.17                                             | 0.01 | 1.86                           |        | 659.33                | 23.57 |  |
| WW-A       | T0  | 1:10   | 103.16                     | 1.16 | 0.84                    | 0.00 | 17.43                   | 0.41 | 76.91           | 0.50 | 7.97  | 1.33 | 1.95                       | 0.39 | 0.48                       | 0.03  |       |       |        |        |        |       |       |      | 0.18                                             | 0.01 | 2.35                           |        | 441.38                | 47.67 |  |
| WW-A       | T0  | 1:5    | 160.50                     | 4.19 | 1.52                    | 0.00 | 30.06                   | 2.08 | 146.16          | 1.24 | 17.25 | 7.47 | 3.69                       | 0.06 | 0.55                       | 0.02  |       |       |        |        |        |       |       |      | 0.19                                             | 0.04 | 4.73                           | 0.60   | 953.14                | 5.84  |  |
| WW-A       | T1  | C      | 15.24                      | 0.89 | 0.19                    | 0.01 | 3.75                    | 0.08 | 0.01            | 0.01 | 11.29 | 0.89 |                            | 0.90 | 0.07                       | 0.78  |       | 15.12 |        | -14.35 |        | 4.55  |       | 0.38 | 0.01                                             | 4.52 | 0.13                           |        |                       |       |  |
| WW-A       | T1  | CD     | 12.57                      | 0.25 | 0.19                    | 0.00 | 3.26                    | 0.07 | 0.12            | 0.01 | 9.00  | 0.26 |                            | 0.45 | 0.04                       | 2.21  |       | 7.51  |        | -5.30  |        | 4.55  |       | 0.27 | 0.06                                             | 2.33 | 0.27                           |        |                       |       |  |
| WW-A       | T1  | 1:10   | 98.85                      | 1.98 | 0.95                    | 0.00 | 18.34                   | 0.24 | 76.20           | 0.95 | 3.35  | 2.21 |                            | 0.44 | 0.01                       | 0.98  | 3.16  | 7.93  | 2.46   | -6.95  | 5.62   | 4.55  | 0.00  | 0.25 | 0.01                                             | 2.28 | 0.17                           |        |                       |       |  |
| WW-A       | T1  | 1:5    | 187.92                     | 5.28 | 1.64                    | 0.01 | 32.11                   | 0.13 | 146.30          | 4.56 | 7.87  | 6.98 |                            | 0.45 | 0.01                       |       |       |       |        |        |        |       |       | 0.25 | 0.03                                             | 2.01 | 0.16                           |        |                       |       |  |
| WW-A       | T1  | IN     | 55.76                      | 0.88 | 1.77                    | 0.00 | 37.02                   | 2.85 | 4.48            | 0.21 | 12.48 | 2.99 | 0.23                       | 0.01 | 1.35                       | 0.04  | 1.22  | 0.33  | 22.61  | 3.79   | -21.39 | 4.12  | 4.55  | 0.00 | 0.33                                             | 0.04 | 4.06                           | 0.41   | 559.29                | 8.31  |  |
| WW-A       | T3  | C      | 15.95                      | 0.39 | 0.19                    | 0.01 | 3.34                    | 0.17 | 0.11            | 0.03 | 12.31 | 0.43 | 0.14                       | 0.01 | 0.53                       | 0.02  | -3.99 | 6.42  | 20.28  | 8.09   | -24.27 | 1.67  | 4.55  | 0.00 | 0.63                                             | 0.02 | 5.93                           | 0.27   | 759.37                | 5.92  |  |
| WW-A       | T3  | CD     | 12.42                      | 0.38 | 0.12                    | 0.00 | 2.83                    | 0.04 | 0.02            | 0.00 | 9.44  | 0.38 | 0.11                       | 0.01 | 0.42                       | 0.02  | -0.13 |       | 22.42  |        | -22.55 |       | 4.55  |      | 0.26                                             | 0.03 | 3.56                           | 0.36   | 534.23                | 1.53  |  |
| WW-A       | T3  | 1:10   | 98.52                      | 4.45 | 0.91                    | 0.00 | 16.88                   | 0.79 | 76.33           | 1.38 | 4.40  | 4.72 | 1.94                       | 0.04 | 0.40                       | 0.01  | 0.20  | 0.23  | 28.07  | 5.50   | -27.87 | 5.73  | 4.55  | 0.00 | 0.76                                             | 0.02 | 4.21                           | 0.20   | 655.29                | 9.47  |  |
| WW-A       | T3  | 1:5    | 177.63                     | 8.99 | 1.57                    | 0.01 | 32.33                   | 0.44 | 148.83          | 1.08 | -5.10 | 9.06 |                            | 0.40 | 0.04                       | 0.41  |       | 22.43 |        | -22.02 |        | 4.55  |       | 0.79 | 0.04                                             | 2.88 | 0.07                           | 715.55 | 6.04                  |       |  |
| WW-A       | T3  | IN     | 52.52                      | 0.12 | 1.63                    | 0.09 | 40.46                   | 0.52 | 3.92            | 0.07 | 6.51  | 0.53 |                            | 1.32 | 0.03                       | -2.75 | 0.05  | 10.46 | 0.21   | -13.21 | 0.16   | 4.46  | 0.00  | 0.77 | 0.06                                             | 6.43 | 0.78                           | 606.74 | 2.58                  |       |  |

| Experiment | Day | Sample | Mean TDN (μM) | SE   | Mean NO <sub>2</sub> <sup>-</sup> | SE   | Mean NO <sub>3</sub> <sup>-</sup> | SE   | NH <sub>4</sub> <sup>+</sup> | SE   | DON   | SE    | Mean DPA (μM) | SE   | Mean PO <sub>4</sub> <sup>3-</sup> | SE   | NCP   | SD   | GPP   | SD   | CR     | SD   | Temp. | SD   | Mean BP (μg C L <sup>-1</sup> h <sup>-1</sup> ) | SE   | Mean Chl.a (μg/l) | SE   | DOC (μM) | SE     |
|------------|-----|--------|---------------|------|-----------------------------------|------|-----------------------------------|------|------------------------------|------|-------|-------|---------------|------|------------------------------------|------|-------|------|-------|------|--------|------|-------|------|-------------------------------------------------|------|-------------------|------|----------|--------|
| WW-A       | T5  | C      | 12.44         | 1.27 | 0.12                              | 0.00 | 2.64                              | 0.03 | 1.27                         | 0.61 | 8.41  | 1.41  | 0.24          | 0.02 | 0.46                               | 0.02 | -1.41 | 2.12 | 12.26 | 1.73 | -13.67 | 0.40 | 4.46  | 0.00 | 0.55                                            | 0.07 | 6.64              | 0.88 | 735.79   | 36.12  |
| WW-A       | T5  | CD     | 13.14         | 1.13 | 0.09                              | 0.00 | 2.73                              | 0.04 | 0.05                         | 0.01 | 10.26 | 1.13  | 0.25          | 0.01 | 0.44                               | 0.04 | -2.89 |      | 6.51  |      | -9.40  |      | 4.46  |      | 0.97                                            | 0.01 | 4.14              | 1.09 | 835.92   | 58.43  |
| WW-A       | T5  | 1:10   | 102.73        | 3.19 | 0.85                              | 0.00 | 17.83                             | 0.24 | 74.61                        | 2.16 | 9.43  | 3.86  | 1.78          | 0.04 | 0.30                               | 0.01 | -2.07 | 1.82 | 4.33  | 0.18 | -6.40  | 1.64 | 4.46  | 0.00 | 1.07                                            | 0.08 | 6.54              | 0.69 | 980.53   | 29.25  |
| WW-A       | T5  | 1:5    | 189.21        | 3.81 | 1.53                              | 0.03 | 24.25                             | 9.71 | 147.34                       | 0.91 | 16.09 | 10.47 | 3.67          | 0.06 | 0.33                               | 0.02 | -3.17 |      | 5.92  |      | -9.09  |      | 4.46  |      | 1.21                                            | 0.04 | 4.99              | 0.09 | 1130.24  | 80.36  |
| WW-A       | T5  | IN     | 52.47         | 1.26 | 1.70                              | 0.00 | 39.76                             | 0.86 | 3.10                         | 0.02 | 7.91  | 1.53  | 0.27          | 0.01 | 1.21                               | 0.01 | 14.50 |      | 31.74 |      | -17.24 |      | 4.44  |      | 1.08                                            | 0.10 | 7.96              | 0.88 | 917.62   | 29.18  |
| WW-A       | T7  | C      | 15.73         | 1.09 | 0.12                              | 0.00 | 2.62                              | 0.14 | 0.54                         | 0.20 | 12.44 | 1.12  | 0.26          | 0.01 | 0.48                               | 0.02 | 11.00 |      | 25.23 |      | -14.23 |      | 4.44  |      | 0.88                                            | 0.06 | 6.49              | 0.39 | 293.67   | 1.10   |
| WW-A       | T7  | C      | 14.13         | 0.28 | 0.11                              | 0.01 | 2.38                              | 0.03 |                              |      | 11.64 | 0.28  | 0.20          | 0.03 |                                    |      | 4.93  |      | 21.40 |      | -16.47 |      | 4.44  |      | 0.46                                            | 0.01 | 7.54              | 0.46 | 304.99   | 4.17   |
| WW-A       | T7  | CD     | 11.43         | 0.52 | 0.05                              | 0.01 | 2.21                              | 0.03 | 0.23                         | 0.01 | 8.94  | 0.52  | 0.22          | 0.04 | 0.30                               | 0.04 | 11.13 |      | 23.95 |      | -12.82 |      | 4.56  |      | 1.31                                            | 0.23 | 6.21              | 0.45 | 1245.32  | 4.32   |
| WW-A       | T7  | CD     | 12.33         | 0.55 | 0.05                              | 0.01 | 1.95                              | 0.21 | 0.51                         | 0.01 | 9.82  | 0.59  | 0.29          | 0.11 |                                    |      | 5.15  |      | 13.80 |      | -8.65  |      | 4.44  |      | 0.89                                            | 0.02 | 7.70              | 1.42 | 1775.29  | 6.94   |
| WW-A       | T7  | C      | 14.93         | 0.57 | 0.12                              | 0.01 | 2.50                              | 0.08 | 0.54                         | 0.26 | 11.77 | 0.63  | 0.23          | 0.02 | 0.48                               | 0.02 | 8.03  | 4.39 | 22.68 | 1.81 | -14.65 | 2.58 | 4.50  | 0.09 | 0.67                                            | 0.11 | 7.01              | 0.40 | 299.33   | 3.27   |
| WW-A       | T7  | CD     | 11.88         | 0.38 | 0.05                              | 0.00 | 2.08                              | 0.11 | 0.37                         | 0.10 | 9.38  | 0.40  | 0.26          | 0.06 | 0.30                               | 0.04 | 5.15  |      | 13.80 |      | -8.65  |      | 4.44  |      | 1.01                                            | 0.06 | 6.95              | 0.70 | 1245.32  | 4.32   |
| WW-A       | T7  | 1:10   | 102.73        | 3.19 | 0.85                              | 0.00 | 17.83                             | 0.24 | 74.61                        | 2.16 | 9.43  | 3.86  | 1.78          | 0.10 | 0.20                               | 0.02 | 7.17  | 2.33 | 12.42 | 7.14 | -5.25  | 4.81 | 4.50  | 0.09 | 0.80                                            | 0.02 | 9.81              | 1.22 | 1024.77  | 72.00  |
| WW-A       | T7  | 1:5    | 188.60        | 3.80 | 1.34                              | 0.26 | 23.74                             | 4.98 | 145.59                       | 1.35 | 17.92 | 6.40  | 3.29          | 0.06 | 0.21                               | 0.02 | 3.16  |      | 10.99 |      | -7.83  |      | 4.44  |      | 0.79                                            | 0.05 | 6.94              | 0.76 | 1124.37  | 177.22 |
| WW-A       | T7  | IN     | 55.32         | 2.42 | 1.72                              | 0.02 | 26.59                             | 5.87 | 1.45                         | 0.67 | 25.55 | 6.38  | 0.30          | 0.07 | 1.32                               | 0.07 |       |      |       |      |        |      |       |      | 0.48                                            | 0.17 | 8.48              | 0.55 | 708.68   | 39.74  |

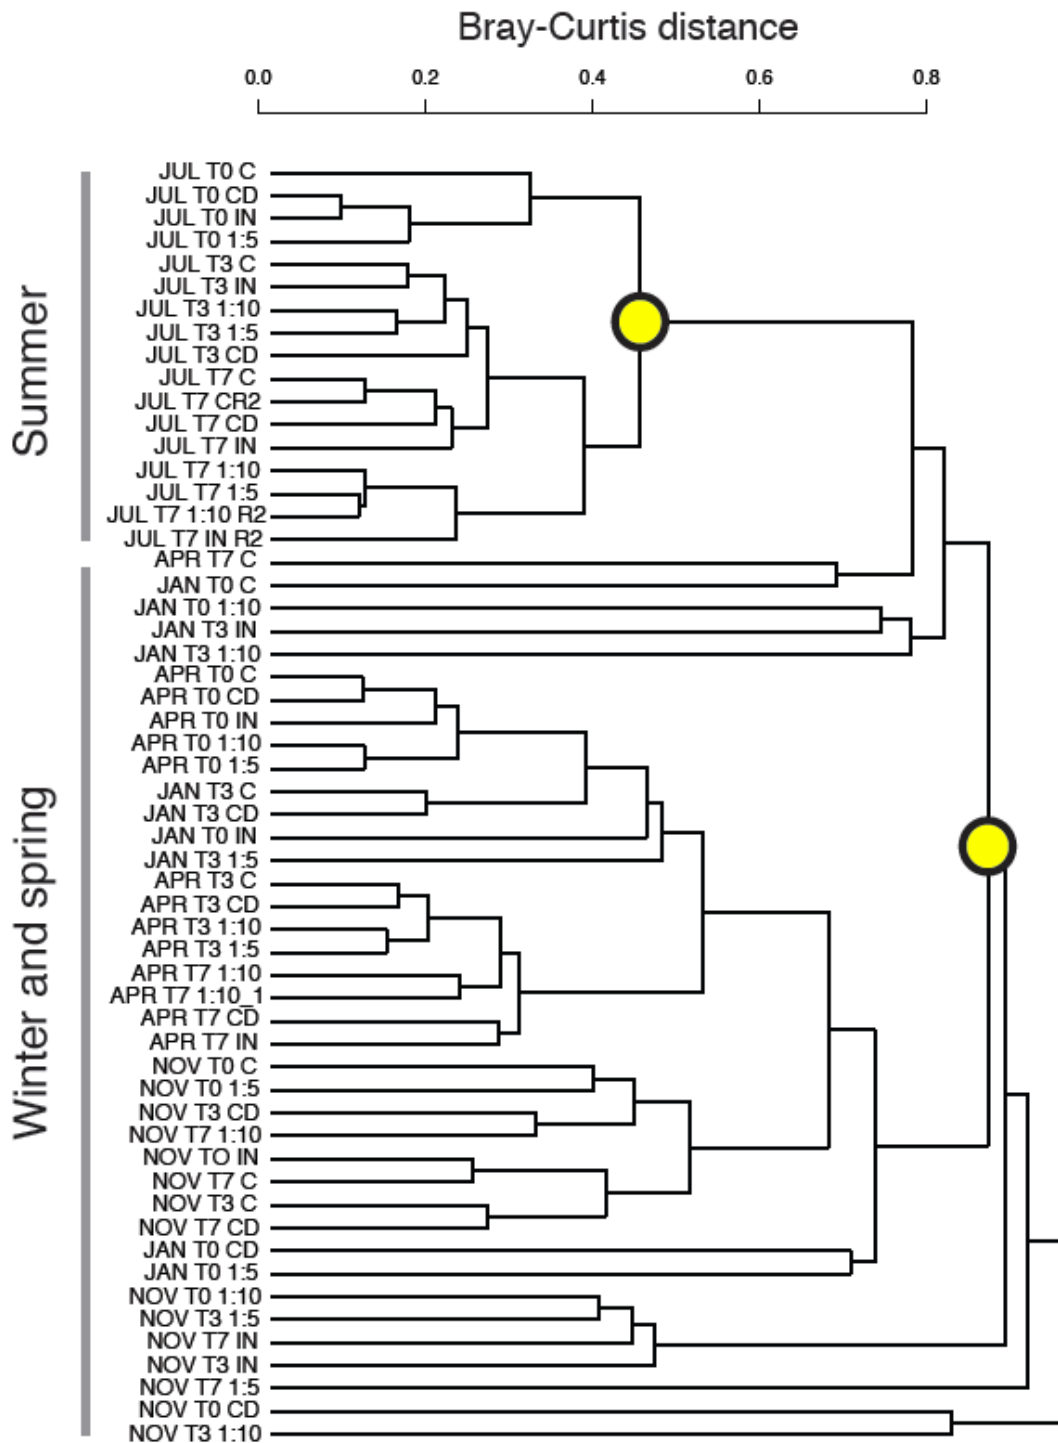

Figure S1. Dendrogram showing a comparison of beta-diversity between samples taken from the experiments performed in January, April, July, November and December. Dissimilarity corresponds to Bray-Curtis distance estimation using 97% 16S rRNA sequence similarity. Yellow circle denote a distinct visual clustering between summer experiments and winter and spring experiments.

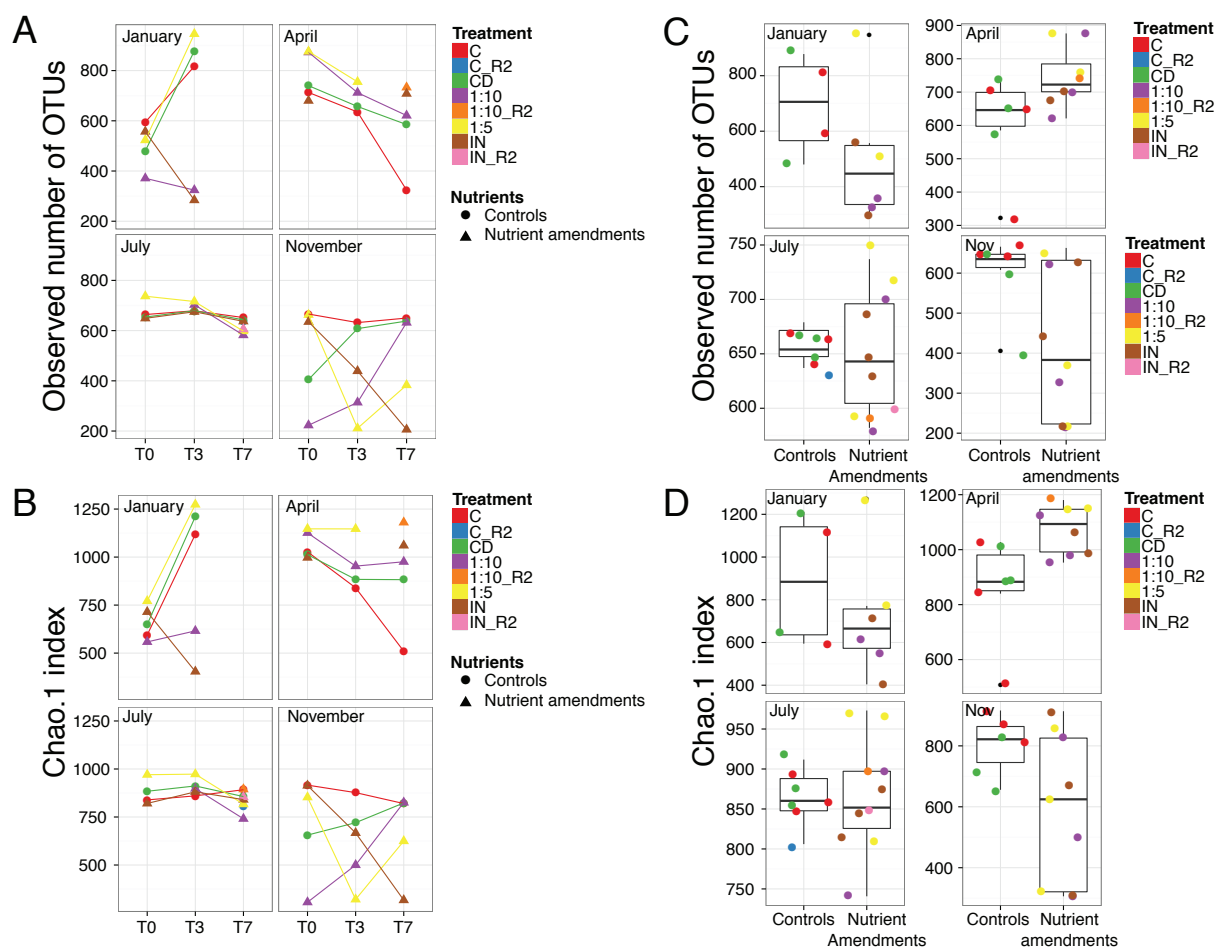

Figure S2. Variation in observed number of OTUs (A) and Chao.1 richness index (B) for the different experiments.



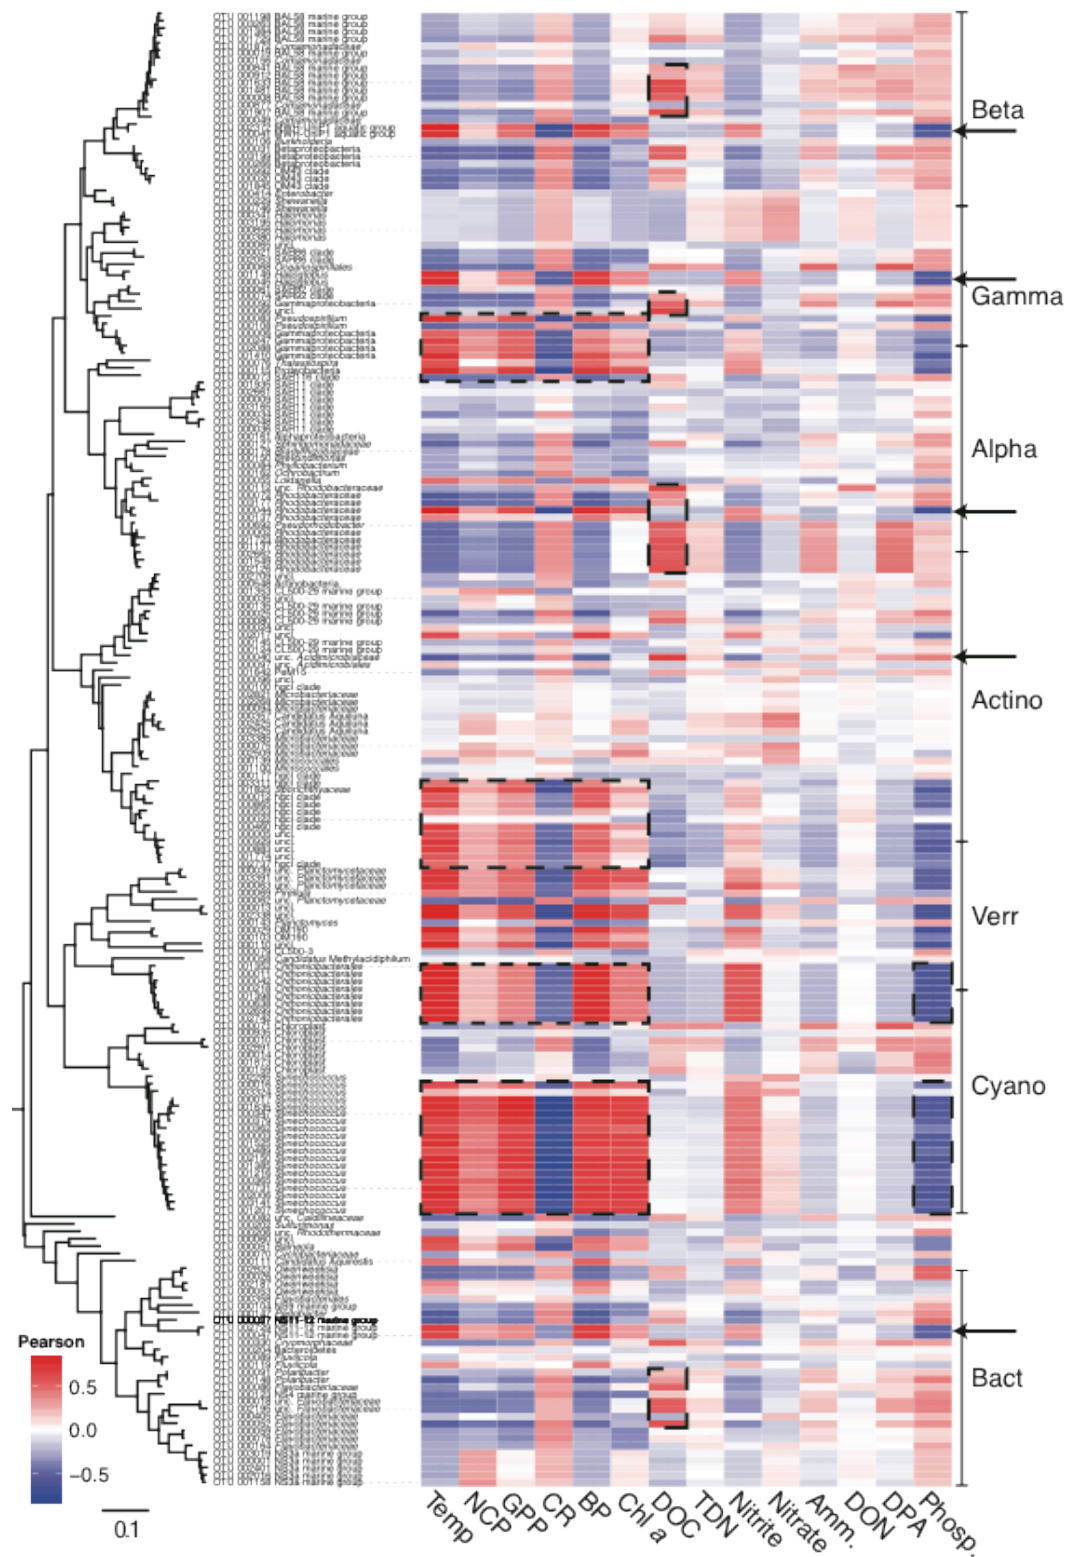

Figure S3. Correlations between shifts in relative abundances of specific individual OTUs and environmental factors and metabolic activity.

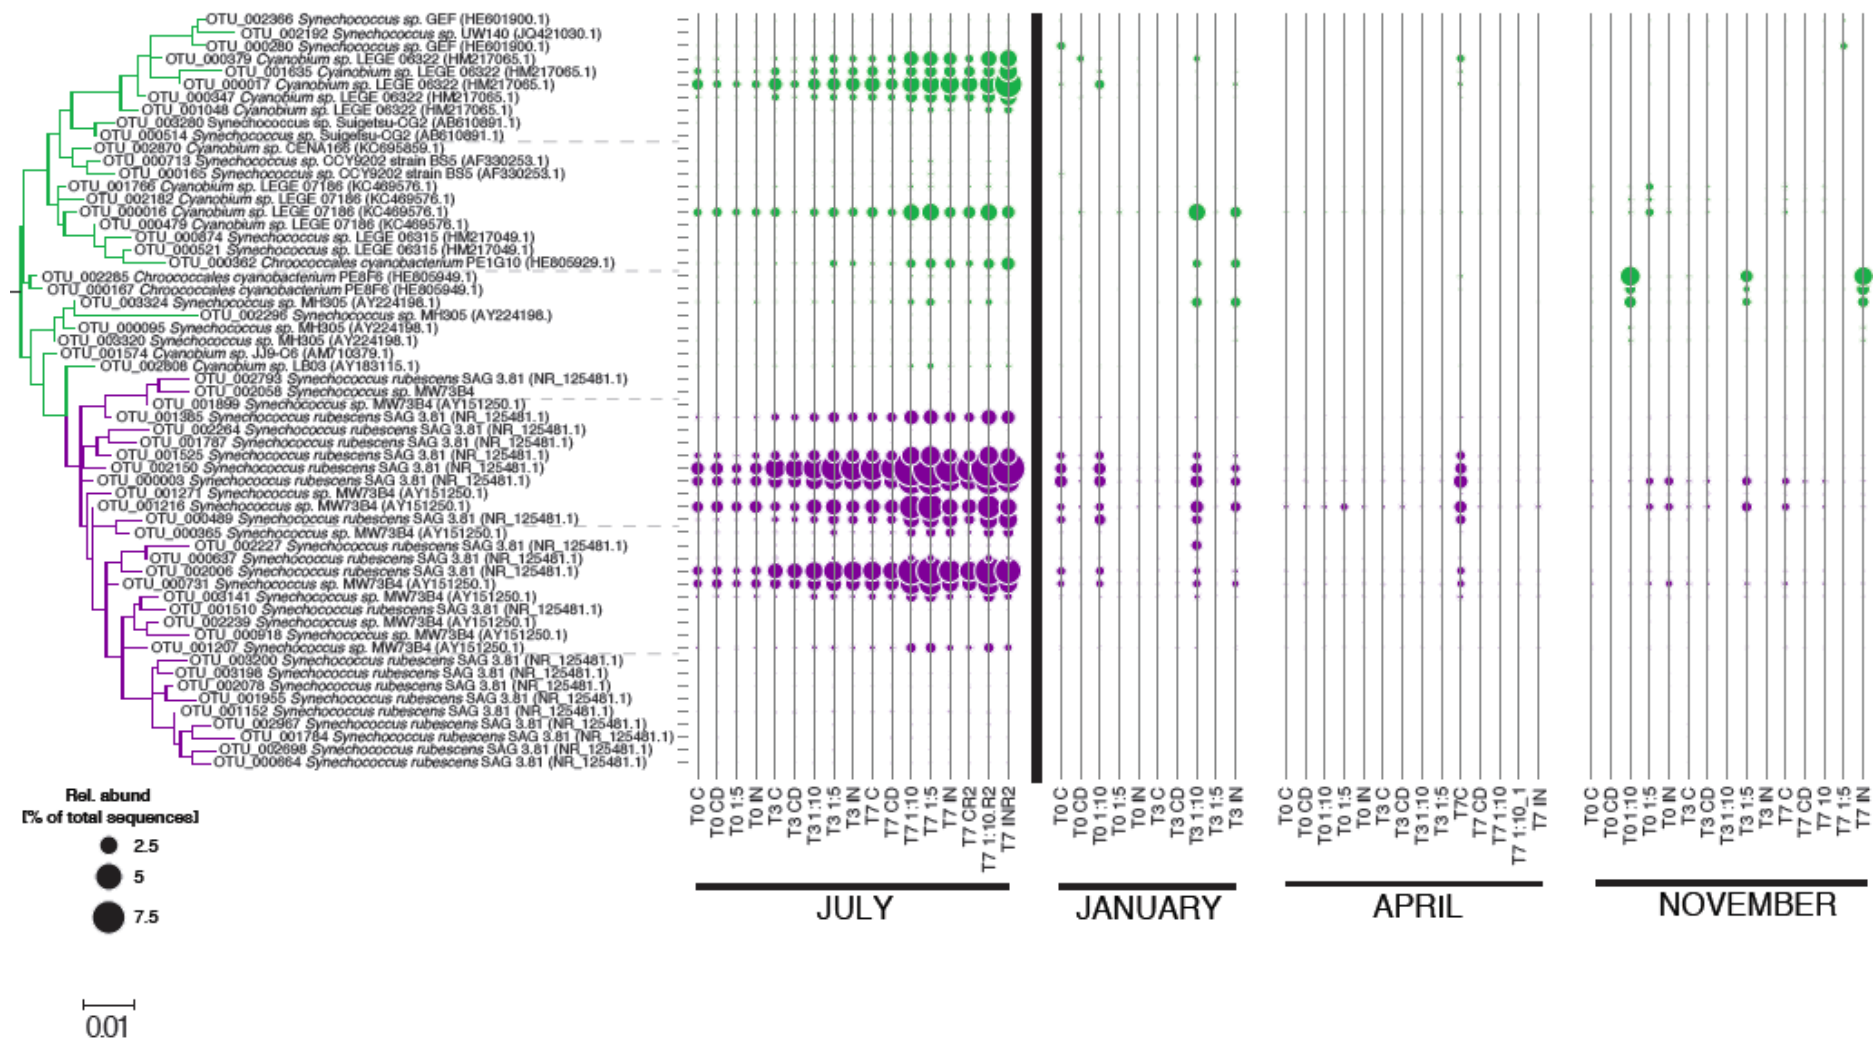

Figure S4. Maximum-likelihood tree of 16S rRNA sequences affiliated with *Synechococcus* obtained from Illumina Miseq-sequencing. Bubble diagram indicate relative abundances (percent of total sequences) in the different treatments and experiments for the 60 most abundant *Synechococcus* OTUs.
